# Supplementary material for: Sulfur Deprivation Modulates Salicylic Acid Responses via Nonexpressor of Pathogenesis-Related Gene 1 in Arabidopsis thaliana
Source: MDPI journal article supplement (doi:10.3390/plants10061065), 2021-05-26
Supplement: s1 [file s1]

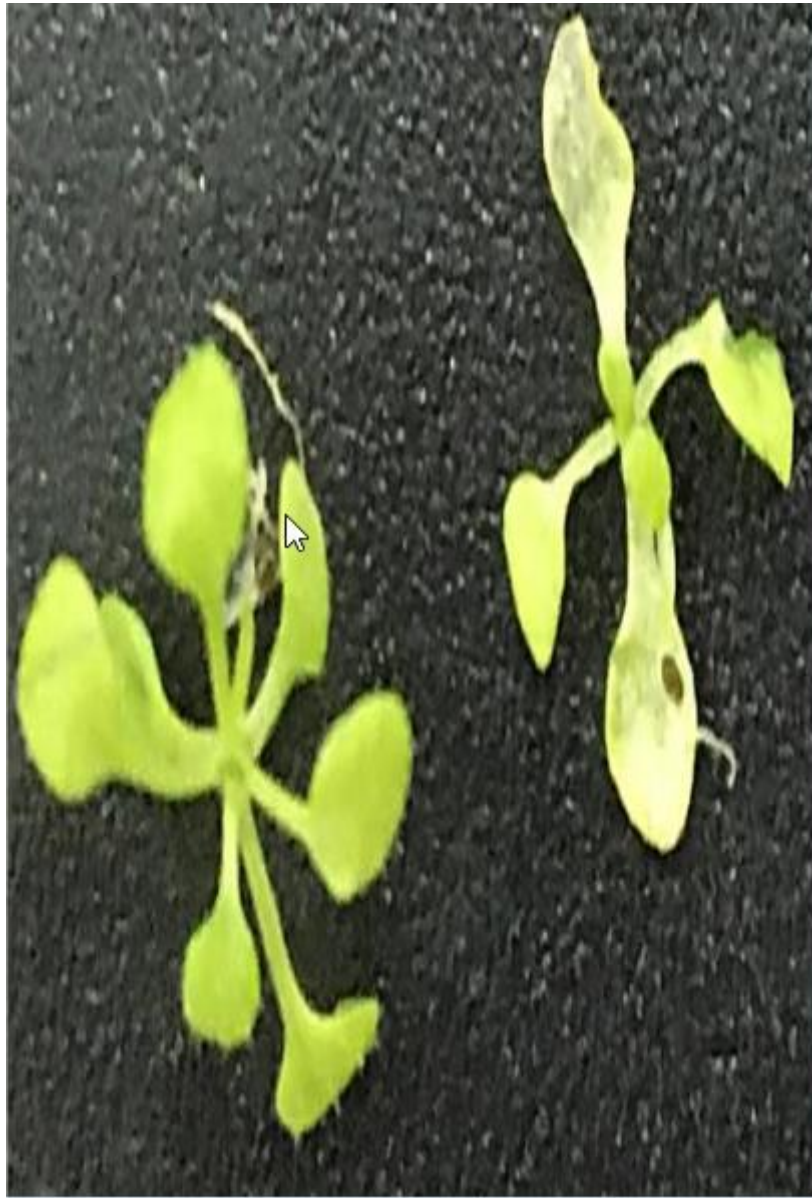

Figure S1: Phenotypic characteristics of *in vitro* plants grown under sulfur deficiency (Right) versus its control (Left).
